# Supplementary material
Source: MDPI journal article supplement (https://www.mdpi.com/2673-8856/2/3/13)
Supplement: s1 [file s1]

Archive with 3 entries (3 files):
- Supplementary Figure S1 Mismatch ditribution.pdf
- Supplementary Table S1 mtDNA Frequencies.xlsx
- Supplementary Text S1 dna-1732819.pdf
