# Supplementary material
Source: MDPI journal article supplement (https://www.mdpi.com/2673-8856/2/3/13)
Supplement: s1 [file s1 › Supplementary Figure S1 Mismatch ditribution.pdf]

Supplementary Figure S1 Mismatch ditribution

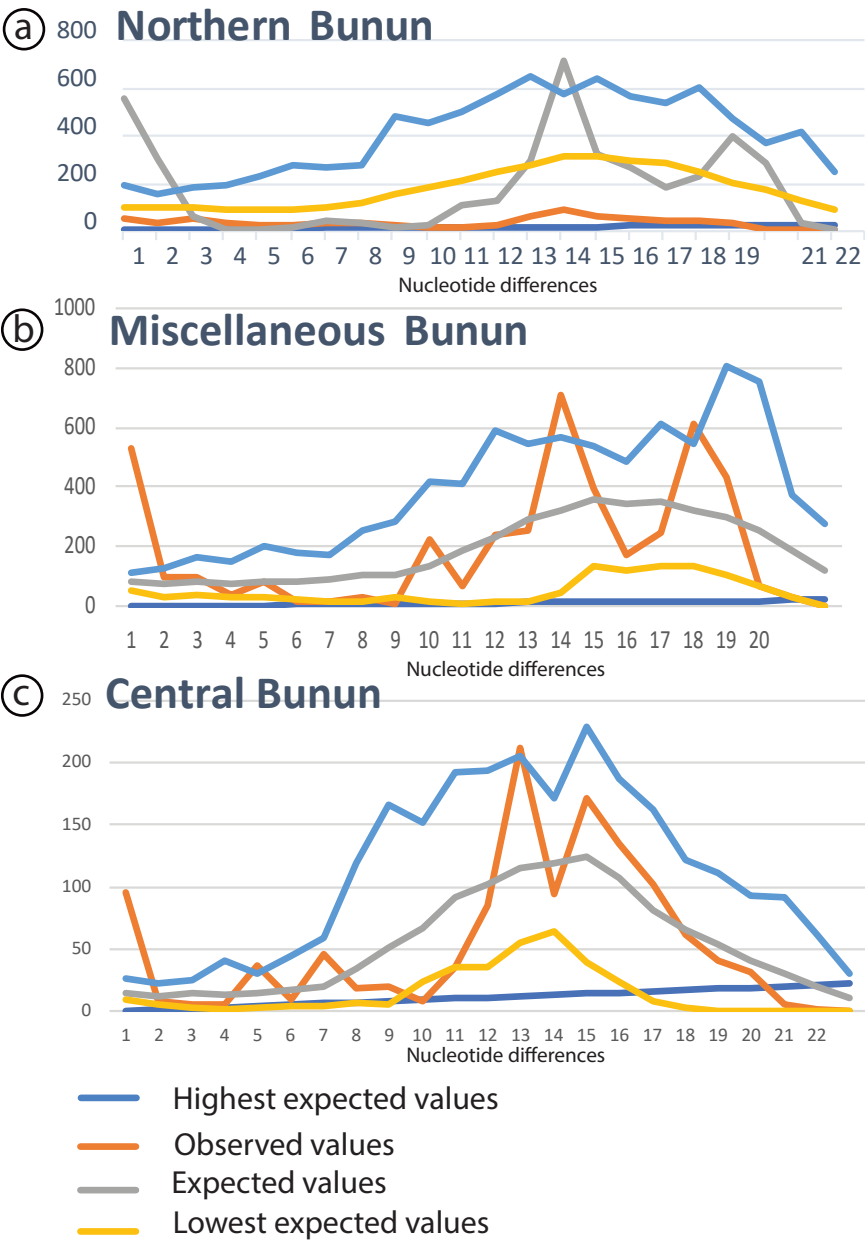

**d**

|                         | Northern Bunun | Miscellaneous Bunun | Central Bunun (Ko) |
|-------------------------|----------------|---------------------|--------------------|
| <b>Tajima's D</b>       | 0.30033        | 0.09499             | -1.28111           |
| Tajima's D p-value      | 0.703          | 0.627               | 0.086              |
| <b>SSD</b>              | 0.03747        | 0.03155             | 0.01988            |
| Model (SSD) p-value     | 0              | 0                   | 0.05               |
| <b>Raggedness index</b> | 0.04037        | 0.05083             | 0.03742            |
| Raggedness p-value      | 0              | 0                   | 0                  |
| number of haplotypes    | 19             | 26                  | 28                 |
| n (individuhs)          | 89             | 94                  | 50                 |
