# Supplementary material
Source: MDPI journal article supplement (https://www.mdpi.com/2673-8856/2/3/13)
Supplement: s1 [file s1 › Supplementary Table S1 mtDNA Frequencies.xlsx]

## Sheet: Supplementary Table 1
Suppementary Table S1. Polymorphisms of mtDNA exclusive to the northern Bunun and comparison with other populations
Haplogroups	Total China (Han) "Putative Han parent" ###	Mainland China				Total East Coast China	Taiwan Urban		Japan	Taiwan Indigenous people (Austronesian speaking Taiwanese, AN_Tw)													All AN_Tw #	Exclusive AN_Tw Putative Austronesian parent ##	Philippines	Mainland Southeast Asia (MSEA)			Total MSEA	Indonesia
		Northeast China	South China	East Coast China			Minnan	Hakka
				Fujian	Matsu					Amis	Atayal	Bunun Central	Bunun Miscellaneous	Bunun North	Paiwan	Puyuma	Rukai	Saisiyat	Taroko	Thao	Tsou	Yami				Thailand	Vietnam	Malaysia		WIN	EIN
A5b1c	0.19			0.68		0.51		2.17				2			0.95								0.16
B4a1	0.39	0.4		0.68		0.51	4.08	8.7					2.08										0.16		11.15		2.16		1.04	3.87	2.78
B4a1a										19.55	2.55		1.04								5.56		3.22	3.22
B4a1a4												2			1.9		1.01	1.15			3.7	10.57	1.77	1.77
B4a2a3								2.17				4			18.3	2.2	6.06						2.34	2.34
B4b1	0.39	0.4		0.68		0.51				2.7	1.27		2.14	6.74			1.01			20	8.33	1.63	7.58		8.08		0.5	1.16	0.32	0.35
B4b1a1									1.47				1.04										0.08	0.08
B4b1a2										2.03	2.55			3.37				1.15					0.89	0.89
B4b1a2b												2											0.08	0.08	0.38
B4b1a2g												26	18.75	24.72						26.67	0.93
B5a	0.19			0.68		0.51	2.04						1.04					3.45					0.32			2.32	2.32		2.15	7.75	2.78
B5a1c							4.08					2											0.08	0.08
B5a2a2a1								2.17		0.68		2	1.04	1.12	5.71	1.1	5.05						1.29	1.29
B5a2a2b												12	9.39	5.62				1.15			8.33		2.41	2.41	0.38
D4a3b2	1.16	0.79		2.03	2	2.02						2											0.08
D5b1c1	0.97	0.79		2.03		1.52	2.04			8.11			2.08										1.13		1.92		0.17		0.08		4.17
D5b3a												6			10.48	1.1	22.22						2.99	2.99
D5b3a1												2					7.07						0.65	0.65
E1a										8.78	1.91		1.04	1.12	1.9	1.1			9.26	3.33			2.18	2.18						0.7	1.39
E1a1													1.04						1.85				0.16	0.16
E1a1a1										1.35	2.55	4	18.3	16.87		1.1		13.01			6.48		4.87	4.87	1.15					1.76	1.39
E2b											5.1			1.12				3.45					0.97	0.97
E2b1												2	1.04	4.49							0.93		0.56	0.56
F1a1	0.58	0.79		0.68		0.51			1.1				1.04		1.9		4.04					0.81	0.65			0.54	2.16		1.28	1.06	1.39
F1a1d	0.39			0.68	2	1.01						4									9.26	0.81	1.03			0.18	0.66		0.4
F1a3+16311													1.04										0.08	0.08		0.36			0.16
F1a3a														2.25		8.79							0.81	0.81	1.54					1.06
F1a3a1												2	1.04										0.16	0.16
F1a3a3												2	2.08			3.3					3.7	2.45	1.04	1.04
F1a3a3a													5.21							6.67			0.57	0.57
F1a4a										0.68		2					1.01				0.93		0.32	0.32		0.18	0.5		0.32
F2a1	0.19	0.4										2											0.08
F3b1a+16093												6			2.86		2.02						0.65	0.65	0.38
F3b1a2										0.68		2			20.98	20.84	24.25				2.78	0.81	5.73	5.73
F4b1	0.39			1.35		1.01				2.03	17.83		27.49	26.97	0.95			9.3	37.03	20.01	3.7		9.69
F4b1*											9.55			1.12						3.33			1.37	1.37
M7b1a2a										0.68	33.12		2.08	3.37	4.76	1.1	4.04	10.21	37.04			6.5	8.49	8.49	1.54
M7c1c1										8.11		4									0.93		1.21	1.21
M7c1c2	1.36	0.79	1.52	2.7		2.02	6.12	2.17				2			7.62	14.29	4.04					0.81	2.18		0.77	0.54	0.83		0.64
M7c1c3										2.03		4			1.9	3.3							0.81	0.81
R9c1a												2		1.12	0.95	1.1	4.04	2.3			22.22	1.63	2.86	2.86	1.54					1.06
Other	93.8	95.64	98.48	87.81	96	89.87	81.64	82.62	97.43	42.59	23.57	0	0	0	18.84	40.68	14.14	54.83	14.82	19.99	22.22	73.98	28.3	51.36	71.17	95.88	90.7	98.84	93.61	82.39	86.1
Sample Size (Total= 4461)	520	257	65	148	50	198	50	45	664	148	157	50	96	89	105	91	99	87	54	30	108	123	1237	na	260	560	603	86	1249	326	72
Genetic Diversity	1	1	1	1	1	1	1	1	0.9996	0.998013	0.989995	1	0.996997	0.990251	0.998916	0.9996	0.997204	0.9996	0.988821	0.9996	0.99969	0.995181	0.997037	0.9996	0.998442	0.999968	0.999729	0.999729	0.999384	0.999483	0.999729
Standard Error of Genetic Diversity	0.000433267	0.000823227	0.00124818	0.00181691	0.00312922	0.00154581	0.00268625	0.00488452	0.00190764	0.0168351	0.0409111	0.0281747	0.0369739	0.0435747	0.021755	0.0200516	0.0284086	0.0108794	0.0739216	0.0845351	0.0225936	0.0241533	0.00442	0.00412134	0.0078155	0.0019748	0.00203529	0.018576	0.00148914	0.00467058	0.00479041
Number of haplogroups	244	156	57	91	40	118	41	35	159	26	20	24	20	14	26	24	24	31	6	11	21	20	107	77	51	151	127	22	226	78	41
Haplogroups shared with Total Han	244	156	57	91	40	118	29	26	49	7	4	6	6	2	9	5	6	8	2	3	4	7	30	0	11	55	77	7	98	22	12
Haplogroup shared with Haplogroups exclusive to AN_Tw	0	0	0	0	0	0	1	4	3	19	16	18	13	11	17	19	18	23	4	7	16	13	77	77	12	4	2	2	6	7	5
Haplogroups not shared with Haan or AN_Tw	0	0	0	0	0	0	11	5	107	0	0	0	1	1	0	0	0	0	0	1	1	0	0	0	28	92	48	13	122	49	24
% AN_Tw	0	0	0	0	0	0	0.0324568	0.172377	0.042686	0.895845	0.926876	0.904821	0.693576	0.642105	0.856848	0.923322	0.904821	0.901092	0.863717	0.46833	0.764491	0.854756	0.890511	1	0.207807	0.0585905	0.0361001	0.0402341	0.0764403	0.112334	0.0928332
% Han	1	1	1	1	1	1	0.297033	0.353585	0.220019	0.104155	0.0731244	0.0951792	0.101019	0.0368421	0.143152	0.076678	0.0951792	0.0989082	0.136283	0.0633397	0.0603133	0.145244	0.109489	0	0.0601136	0.254232	0.438601	0.0444389	0.394002	0.111413	0.0703097
% Non Han and Non AN_Tw origin or exclusive to the group	0	0	0	0	0	0	0.67051	0.474037	0.737295	0	0	0	0.205405	0.321053	0	0	0	0	0	0.46833	0.175196	0	0	0	0.732079	0.687177	0.525299	0.915327	0.529558	0.776254	0.836857
AN_Tw: Austronesian speaking Taiwanese_x000D_ Horizontal grey fill: Haplogroups prevailing among Bunun
WIN, West Indonesia (Java, Sumatra, Borneo); EIN, East Indonesia (Maluku Ambo)
# All Tw_AN include Amis, Atayal, Bunun Central, Bunun Miscellaneous, Bunun North, Paiwan, Puyuma, Rukai, Saisiyat, Taroko, Thao, Tsou, and Yami
## Exclusive AN_Tw. This colum represent the putative Austronesian parental group. It comprises haplogroups of the "All AN_Tw" not shared with haplogroups of the "Total China (Han)
### This colum represent the putative Han parental group. The column includes North China, South China, and East coast of China (Fujian and Matsu)
